# Supplementary material for: Impact of Long-Term Refrigeration, Freezing, and Repeated Freeze-Thaw Processes on the Physicochemical Characteristics of Extracellular Vesicles
Source: Research Square preprint supplement (doi:10.21203/rs.3.rs-7586495/v1), 2025-09-29
Supplement: Supplementary file 1 [file 48dcf634f591e57450c8083c.pdf]

**Impact of Long-Term Refrigeration, Freezing, and Repeated Freeze-Thaw Processes on the Physicochemical Characteristics of Extracellular Vesicles**

Ryosuke Inayama<sup>1</sup>, Saki Horie<sup>2</sup>, Risako Okada<sup>2</sup>, Naoomi Tominaga<sup>2\*</sup>

<sup>1</sup> Otsuka Electronics Co. Ltd., 3-26-3, Shodai-Tajika, Hirakata-shi, Osaka, 573-1132, Japan

<sup>2</sup> Department of Clinical Laboratory Science, Faculty of Health Sciences, Yamaguchi University Graduate School of Medicine, 1-1-1 Minami-kogushi, Ube, Yamaguchi, 755-8505, Japan

\* Corresponding author

**Contact information**

Naoomi Tominaga, Ph.D.

Department of Clinical Laboratory Science, Faculty of Health Sciences, Graduate School of Medicine, Yamaguchi University, 1-1-1 Minami-kogushi, Ube, Yamaguchi, 755-8505, Japan

Email: [ntominag@yamaguchi-u.ac.jp](mailto:ntominag@yamaguchi-u.ac.jp)

**Keywords**

Extracellular vesicles, Preservation, Cryopreservation, Freeze-Thaw Cycles, Storage Temperature

36     **Full, uncropped images of the Western blots of Figure 1C.**

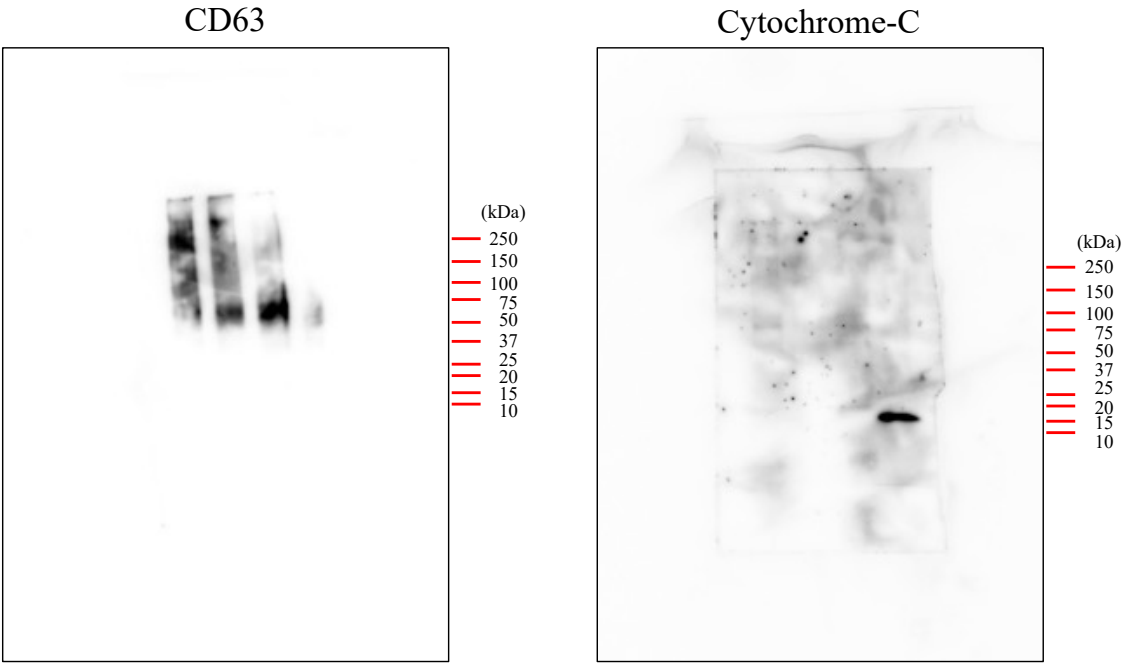

37  
38  
39
