# Supplementary material for: Impact of Long-Term Refrigeration, Freezing, and Repeated Freeze-Thaw Processes on the Physicochemical Characteristics of Extracellular Vesicles
Source: Research Square preprint supplement (doi:10.21203/rs.3.rs-7586495/v1), 2025-09-29
Supplement: Supplementary file 2 [file ed5a7e266f5b67a26fa9c6ca.pdf]

**Impact of Long-Term Refrigeration, Freezing, and Repeated Freeze-Thaw Processes on the Physicochemical Characteristics of Extracellular Vesicles**

Ryosuke Inayama<sup>1</sup>, Saki Horie<sup>2</sup>, Risako Okada<sup>2</sup>, Naoomi Tominaga<sup>2\*</sup>

<sup>1</sup> Otsuka Electronics Co. Ltd., 3-26-3, Shodai-Tajika, Hirakata-shi, Osaka, 573-1132, Japan

<sup>2</sup> Department of Clinical Laboratory Science, Faculty of Health Sciences, Yamaguchi University Graduate School of Medicine, 1-1-1 Minami-kogushi, Ube, Yamaguchi, 755-8505, Japan

\* Corresponding author

**Contact information**

Naoomi Tominaga, Ph.D.

Department of Clinical Laboratory Science, Faculty of Health Sciences, Graduate School of Medicine, Yamaguchi University, 1-1-1 Minami-kogushi, Ube, Yamaguchi, 755-8505, Japan

Email: ntominag@yamaguchi-u.ac.jp

**Keywords**

Extracellular vesicles, Preservation, Cryopreservation, Freeze-Thaw Cycles, Storage Temperature

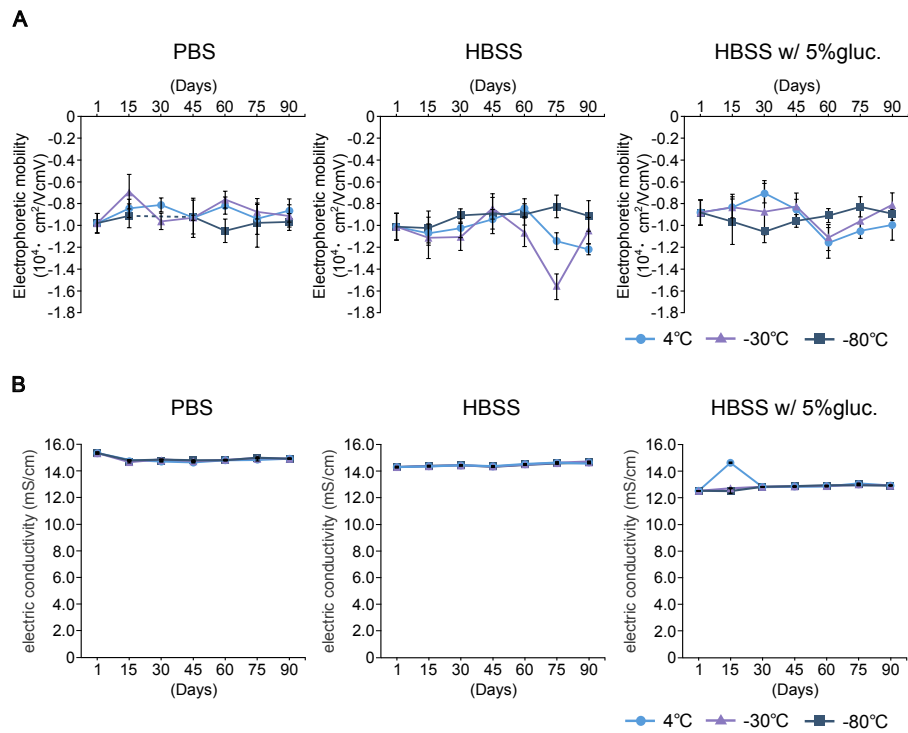

**Supplementary Figure 1. Stability of PC3-derived EVs under various storage conditions over 90 days, examining electrophoretic mobility and electric conductivity.**

Time-course analysis of (A) electrophoretic mobility ( $10^4 \cdot \text{cm}^2/\text{VcmV}$ ) and (B) electric conductivity (mS/cm) of EVs. EVs were suspended in PBS (left column), HBSS (middle column), or HBSS with 5% glucose (right column) and stored at 4 °C (light blue line with circles), –30 °C (purple line with triangles), or –80 °C (dark blue line with squares) for up to 90 days. Data are presented as mean  $\pm$  SD.

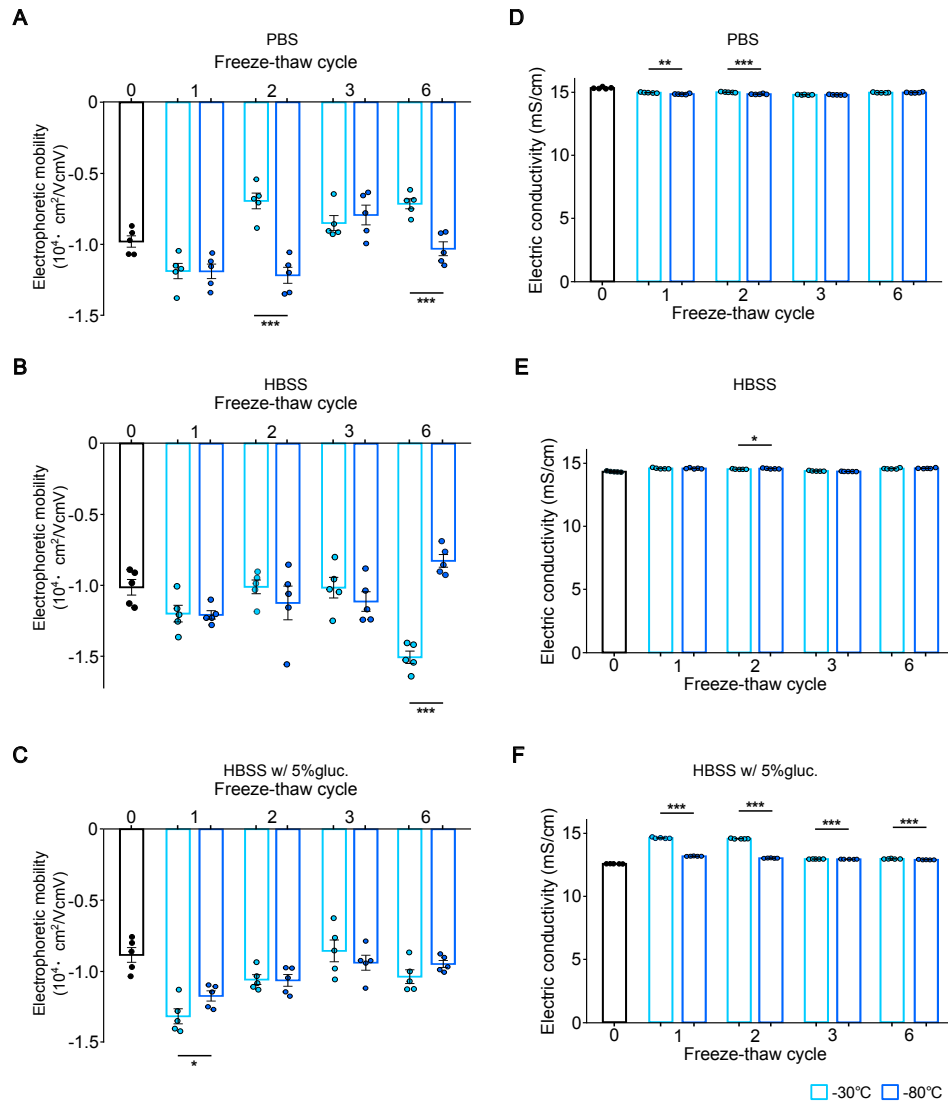

**Supplementary Figure 2. Stability of PC3-derived EVs against repeated freeze-thaw cycles, examining electrophoretic mobility and electric conductivity.**

EVs were suspended in PBS (A, D), HBSS (B, E), or HBSS with 5% glucose (C, F) and subjected to 0, 1, 2, 3, or 6 freeze-thaw (FT) cycles. Freeze-thaw cycles were performed by freezing at either  $-30^{\circ}\text{C}$  (light blue bars) or  $-80^{\circ}\text{C}$  (dark blue bars) and thawing at room temperature. (A-C) Electrophoretic mobility ( $10^4 \cdot \text{cm}^2/\text{VcmV}$ ). (D-F) Electric conductivity (mS/cm). Data are presented as mean  $\pm$  SD ( $n=5-6$  per group). Statistical significance was determined by Student's t-test.  $p < 0.05$ ,  $p < 0.01$ ,  $p < 0.001$ .

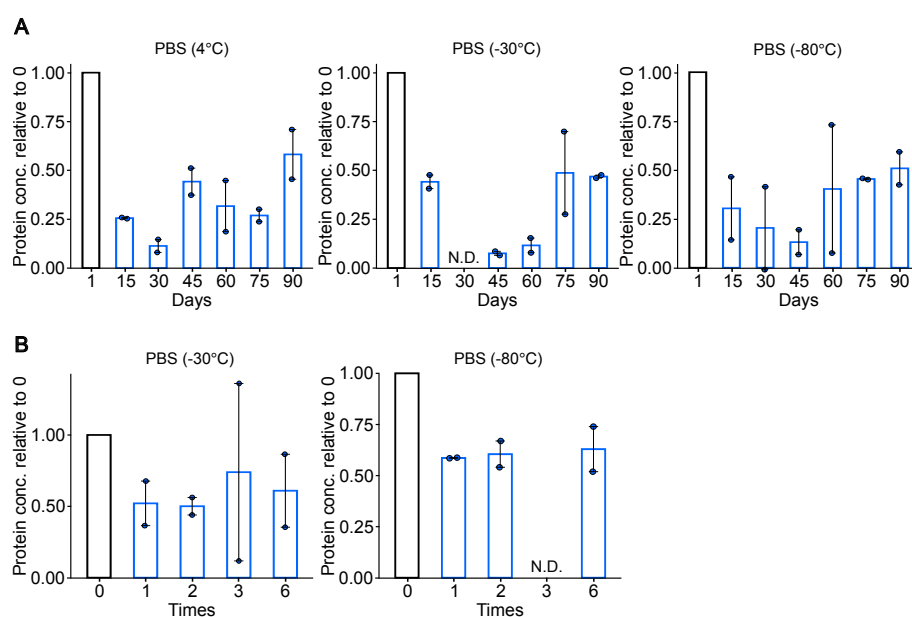

**Supplementary Figure 3. Protein concentration of PC3-derived EVs in PBS under various storage and freeze-thaw conditions.**

(A, C, E) Protein concentration of EVs suspended in PBS and stored at (A) 4 °C, (C) –30 °C, or (E) –80 °C for up to 90 days. Protein concentration is shown relative to Day 1 (0 days of storage). (B, D) Protein concentration of EVs suspended in PBS and subjected to 0, 1, 2, 3, or 6 freeze-thaw (FT) cycles at (B) –30 °C or (D) –80 °C. Protein concentration is shown relative to the non-frozen control (0 FT cycles). Data are presented as mean  $\pm$  SD (n=2 per group). N.D. = Not Detected
